# Supplementary material
Source: publisher site journal article supplement (https://www.dovepress.com/article/381603)
Supplement: Supplementary file 1 [file get_supplementary_file.php]

| **Supplementary table 1** Primer sequences used for q-PCR | |
| --- | --- |
| Gene | Primer sequence |
| hsa_circ_0001600 | F: 5’-GCAGTCTCCCTAAAATTCCCTCG -3’ |
| R: 5’-AAGGCGGAAAATTGCTACCCA -3’ |
| hsa_circ_0001974 | F: 5’-GACATCTACCAGAAGCGGTG-3’ |
| R: 5’-GTCTAGAATGGCCACAAGGTT-3’ |
| hsa_circ_0076155 | F: 5’-GAGGCATTATCCGGAGAACCA-3’ |
| R: 5’-TGTCTCCAATCATCGGCGTT-3’ |
| hsa_circ_0054947 | F: 5’-ACTGGGCAACTTTGGAAGAACT-3’ |
| R: 5’-CCACCAGTCTCAGTTTGCCT-3’ |
| hsa_circ_0004585 | F: 5’-CGTGACAGCAAGATGTGCAA-3’ |
| R: 5’-CAGCATGGCCTTGAAGAGGA-3’ |
| hsa_circ_0034435 | F: 5’-GCTGTGACAACTGTCCCTACA-3’ |
| R: 5’-CAAACACGCTGTTGTCTCCG-3’ |
